# Supplementary material
Source: PubMed Central journal article supplement (PMC4936357)
Supplement: IAI.00285-16_zii999091745so1.pdf [file IAI.00285-16_zii999091745so1.pdf]

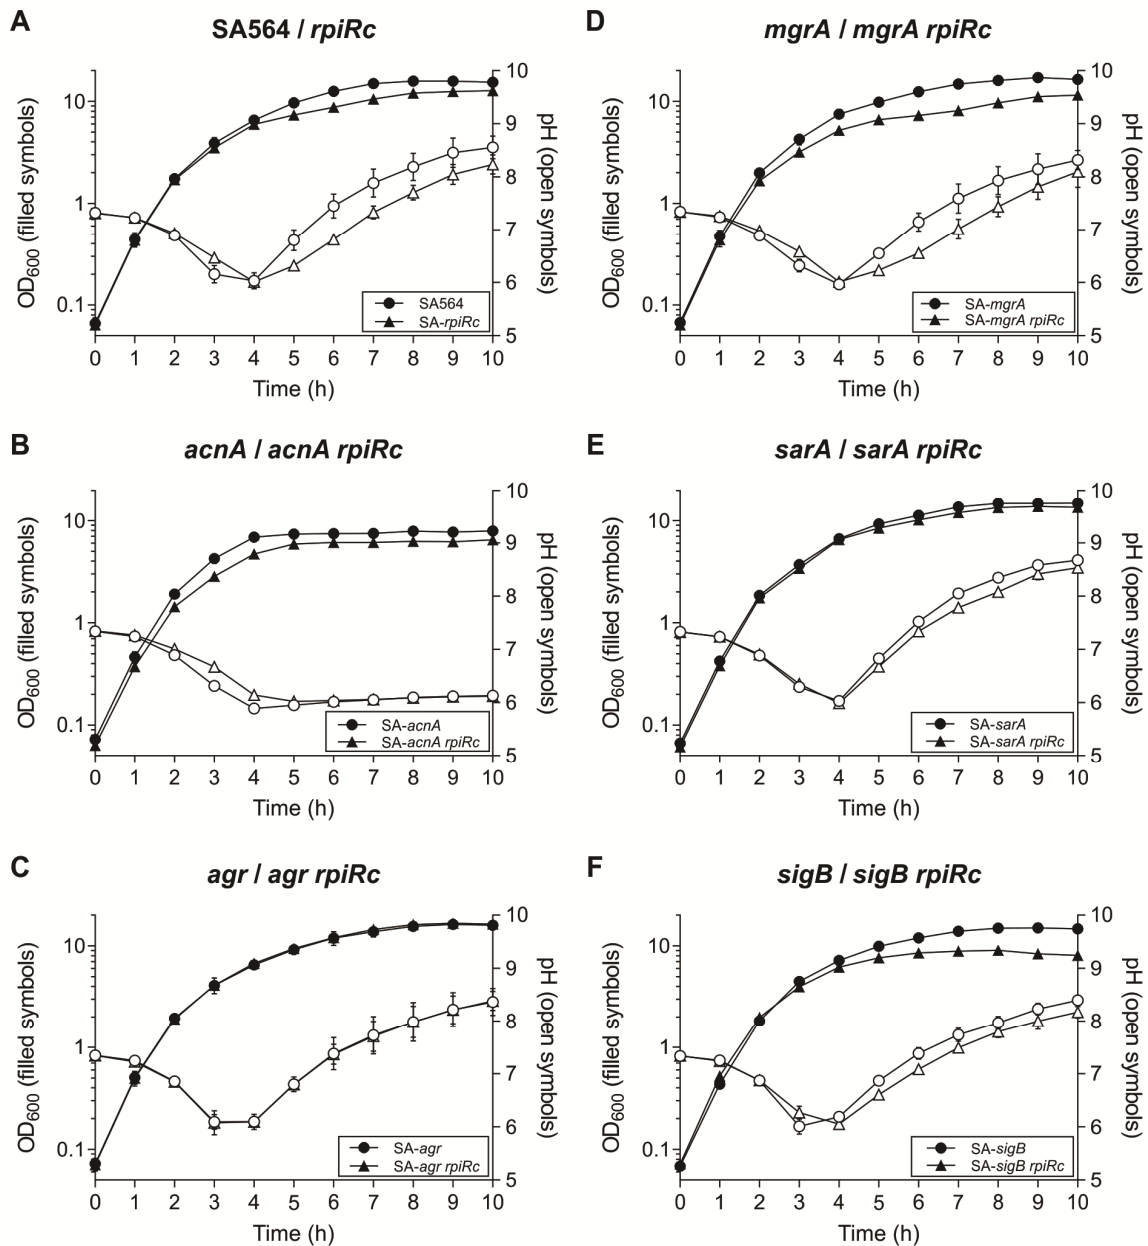

**Suppl. Fig. 1 Growth and pH profiles of single and double mutants.**

Growth analyses of the *S. aureus* wild-type strain SA564 or different regulatory mutants (circles) and their respective *rpiRc* mutants (triangles) under aerobic conditions (10:1 flask-to-medium ratio, 225 rpm) at 37°C in TSB. Shown are the mean and standard deviation (SD) for at least three independent experiments.

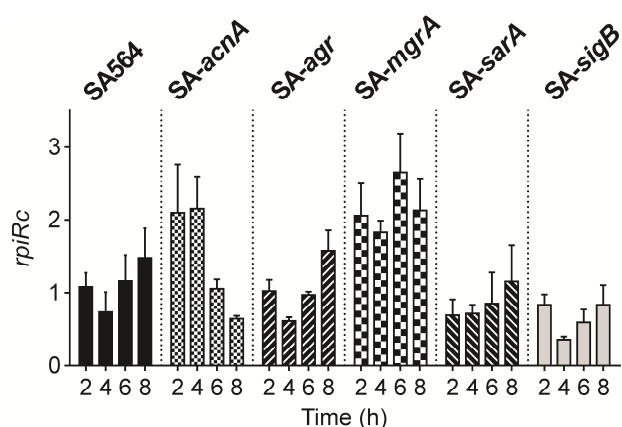

**Suppl. Fig. 2 Effect of virulence regulators on *rpiRc* mRNA levels at different growth phases.**

Total RNA from *S. aureus* SA564 and mutants of known regulatory elements affecting virulence (the TCA-cycle activity, the Agr system, the MgrA and SarA proteins, and the alternative sigma factor  $\sigma^B$ ) cultivated for the indicated time under aerobic conditions at 37°C in TSB were subjected to quantitative real-time RT-PCR and the relative transcript levels of the *rpiRc* gene was normalized to *gyrB* and 16S *rRNA*. Shown are the mean and standard deviation (SD) for at least three independent experiments performed in duplicate.

**Supplemental Table S1. Oligonucleotides used in this study<sup>a</sup>**

| Gene                                  | Primer          | Nucleotide sequence (5' → 3')            |
|---------------------------------------|-----------------|------------------------------------------|
| Construction<br><i>SA-rpiRc_rpiRc</i> | SAV2315_compl-f | ATTATGAATTCGGAGTGATTAATATGTCAA<br>ACGTAC |
|                                       | SAV2315_compl-r | TATAAGGATCCGTAGTGTGAAAACTTATA<br>AGTGGC  |
|                                       | ermB-int+       | CGAGTGAAAAAGTACTCAACC                    |
|                                       | ermB-int-       | CTTGCTCATAAGTAACGGTAC                    |
|                                       | SAV2315_C_r     | CTTATTTTATGACAAATTTGGCCC                 |
| qPCR <i>gyrB</i>                      | <i>gyrB</i> -f  | GACTGATGCCGATGTGGA                       |
|                                       | <i>gyrB</i> -r  | AACGGTGGCTGTGCAATA                       |

|                      |                              |                                                                     |
|----------------------|------------------------------|---------------------------------------------------------------------|
| qPCR 16S <i>rRNA</i> | 16SrRNA-RT-f<br>16SrRNA-RT-r | CGTGCTACAATGGACAATACAAA<br>ATCTACGATTACTAGCGATTCCA                  |
| qPCR <i>RNAIII</i>   | RNAIII-RT-f<br>RNAIII-RT-r   | AGGAGTGATTTCAATGGCACAAG<br>TGTGTCGATAATCCATTTTACTAAGTCA             |
| qPCR <i>hla</i>      | hla-RT-f<br>hla-RT-r         | GAACCCGGTATATGGCAATCAA<br>ATCAAGGAAGTTCTCTGCTGC                     |
| qPCR <i>spa</i>      | spa-RT-f<br>spa-RT-r         | TACTTATATCTGGTGGCGTAA<br>GGTCGTCTTTAAGACTTTGA                       |
| qPCR <i>capA</i>     | capA-RT-f<br>capA-RT-r       | TTCCGAAGATTATGAGTGTGGA<br>AAGCGCGACAATAATCCTAA                      |
| qPCR <i>rpiRc</i>    | rpiRC-RT-f<br>rpiRC-RT-r     | CGCACTTAATCATGCAAATAACG<br>GATAACTTTTGGTATAAGTCGGTAG                |
| qPCR <i>agrB(D)</i>  | RNAII<br>agrB-probe-r        | GCCTTATCTATTATAGGATTGATTTC<br>CATATTAACAAGTGTATTCATGATTAATCCT<br>CC |

<sup>a</sup>All primers were produced by Eurofins MGW Operon.
